# Supplementary material for: High-temperature structural phase transition coupled with dielectric switching in an organic–inorganic hybrid crystal: [NH3(CH2)2Br]3CdBr5
Source: Royal Society of Chemistry journal article supplement (doi:10.1039/c6dt04799h), 2017-01-01
Supplement: c6dt04799h1.pdf [file c6dt04799h1.pdf]

## Supporting Information

### High-temperature structural phase transition coupled with switchable dielectric properties in an organic-inorganic hybrid crystal: $[\text{NH}_3(\text{CH}_2)_2\text{Br}]_3\text{CdBr}_5$

Hai-Peng Chen, Zhong-Xia Wang, Cheng Chen, Yang Lu, Zi Yin, Xiao-Fen Sun and Da-Wei Fu\*

*Ordered Matter Science Research Center, Jiangsu Key Laboratory for Science and Applications of Molecular Ferroelectrics, Southeast University, Nanjing 211189, PR China*

\*E-mail: dawei@seu.edu.cn.

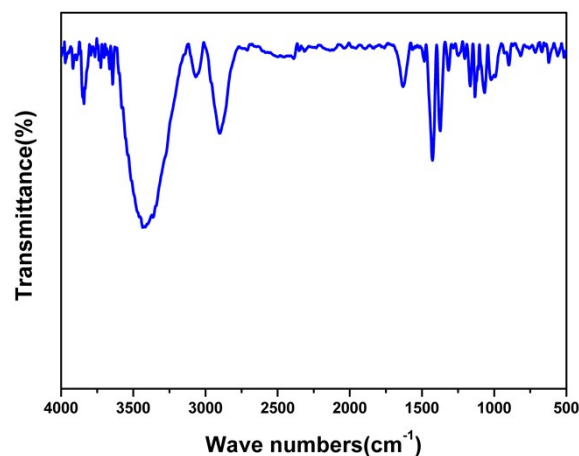

**Fig. S1** Infrared (IR) spectra of **1** in KBr pellet recorded on a Shimadzu model IR-60 spectrometer at room temperature.

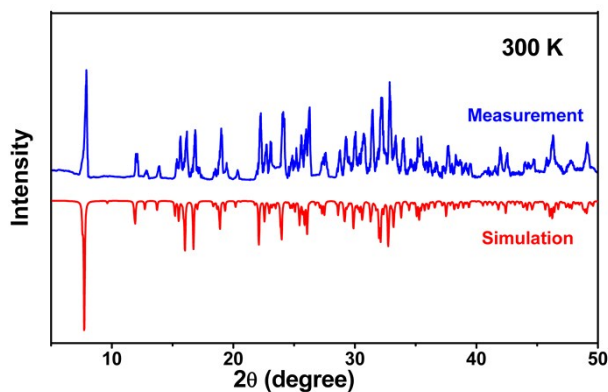

**Fig. S2** Experimental powder diffraction (XRPD) patterns match very well with the simulated ones in terms of the crystal structures at 300 K.

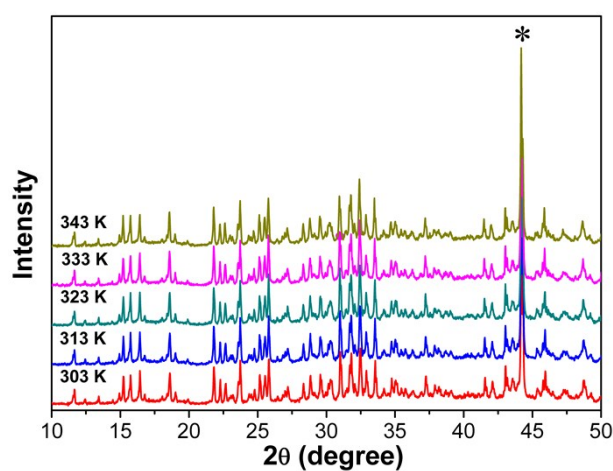

**Fig. S3** Experimental powder diffraction (XRPD) patterns were measured in terms of the crystal structures at different temperatures. The strong peaks around 44deg arise from the sample holder.

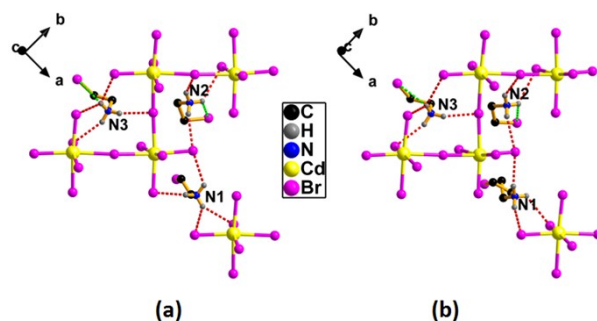

**Fig. S4** Hydrogen-bonding interactions (red dashed lines) between the organic and inorganic components in 1 are shown at (a) 293 K and (b) 373 K. The green and red dashed line representative the hydrogen bonds, whose acceptor are intramolecular Br atoms and intermolecular Br atoms, respectively. Hydrogen atoms bonded to the C atoms were omitted for clarity.

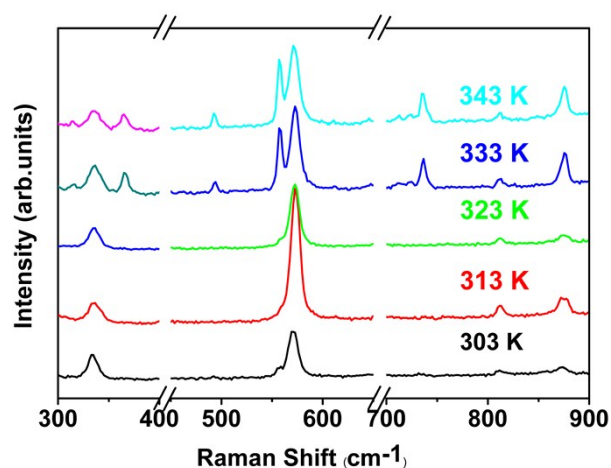

**Fig. S5** Raman spectra of **1** in the spectral ranges of 200–3500  $\text{cm}^{-1}$  measured at various temperatures.

**Table S1.** Selected bond lengths [ $\text{\AA}$ ] and angles [ $^\circ$ ] for **1** at 293 K and 373 K.

|                            |                          |            |                            |                        |        |
|----------------------------|--------------------------|------------|----------------------------|------------------------|--------|
| 293 K                      | Cd1—Br1                  | 2.717 (3)  | Cd1—Br2                    | 2.802 (4)              |        |
|                            | Cd1—Br3                  | 2.900 (4)  | Cd1—Br3 <sup>i</sup>       | 2.952 (3)              |        |
|                            | Cd1—Br4                  | 2.700 (3)  | Cd1—Br5                    | 2.696 (4)              |        |
|                            | Br3—Cd1 <sup>ii</sup>    | 2.952 (3)  |                            |                        |        |
|                            | Br1—Cd1—Br2              | 90.27 (7)  | Br1—Cd1—Br3                | 89.43 (13)             |        |
|                            | Br1—Cd1—Br3 <sup>i</sup> | 172.32 (5) | Br2—Cd1—Br3                | 84.02 (6)              |        |
|                            | Br2—Cd1—Br3 <sup>i</sup> | 83.31 (7)  | Br3—Cd1—Br3 <sup>i</sup>   | 85.71 (13)             |        |
|                            | Br4—Cd1—Br1              | 95.91 (14) | Br4—Cd1—Br2                | 92.18 (6)              |        |
|                            | Br4—Cd1—Br3              | 173.47 (5) | Br4—Cd1—Br3 <sup>i</sup>   | 88.58 (13)             |        |
|                            | Br5—Cd1—Br1              | 98.66 (8)  | Br5—Cd1—Br2                | 167.15 (5)             |        |
|                            | Br5—Cd1—Br3              | 86.83 (8)  | Br5—Cd1—Br3 <sup>i</sup>   | 87.03 (9)              |        |
|                            | Br5—Cd1—Br4              | 96.05 (8)  | Cd1—Br3—Cd1 <sup>ii</sup>  | 168.56 (5)             |        |
|                            | 373 K                    | Cd1—Br1    | 2.7181                     | Cd1—Br2                | 2.8051 |
|                            |                          | Cd1—Br3    | 2.9188                     | Cd1—Br3 <sup>iii</sup> | 2.9714 |
| Cd1—Br4                    |                          | 2.7049     | Cd1—Br5                    | 2.6989                 |        |
| Br3—Cd1 <sup>iv</sup>      |                          | 2.8051     |                            |                        |        |
| Br1—Cd1—Br2                |                          | 90.3       | Br1—Cd1—Br3                | 89.5                   |        |
| Br1—Cd1—Br3 <sup>iii</sup> |                          | 172.5      | Br2—Cd1—Br3                | 84.2                   |        |
| Br2—Cd1—Br3 <sup>iii</sup> |                          | 83.5       | Br3—Cd1—Br3 <sup>iii</sup> | 85.7                   |        |
| Br4—Cd1—Br1                |                          | 96.0       | Br4—Cd1—Br2                | 92.3                   |        |
| Br4—Cd1—Br3                |                          | 173.5      | Br4—Cd1—Br3 <sup>iii</sup> | 88.5                   |        |
| Br5—Cd1—Br1                |                          | 98.6       | Br5—Cd1—Br2                | 167.3                  |        |
| Br5—Cd1—Br3                |                          | 86.8       | Br5—Cd1—Br3 <sup>iii</sup> | 86.9                   |        |
| Br5—Cd1—Br4                |                          | 95.8       | Cd1—Br3—Cd1 <sup>iv</sup>  | 168.8                  |        |

<sup>a</sup> Symmetry codes: (i)  $-x+3/2, y-1/2, -z+3/2$ ; (ii)  $-x+3/2, y+1/2, -z+3/2$ ; (iii)  $-x+1/2, y-1/2, -z+3/2$ ; (iv)  $-x+1/2, y+1/2, -z+3/2$ .

**Table S2.** Hydrogen-Bond Geometry (Å, deg) for N-H $\cdots$ Br interactions at 293 K and 373 K in **1**.

|       | D—H $\cdots$ A                     | H $\cdots$ A | D $\cdots$ A | D—H $\cdots$ A |
|-------|------------------------------------|--------------|--------------|----------------|
| 293 K | N1—H1C $\cdots$ Br <sup>4v</sup>   | 2.84         | 3.483 (11)   | 129.7          |
|       | N1—H1C $\cdots$ Br <sup>2v</sup>   | 2.63         | 3.352 (12)   | 137.5          |
|       | N1—H1D $\cdots$ Br <sup>1</sup>    | 2.73         | 3.357 (11)   | 127.6          |
|       | N1—H1D $\cdots$ Br <sup>8iv</sup>  | 3.13         | 3.876 (13)   | 141.7          |
|       | N1—H1E $\cdots$ Br <sup>4</sup>    | 2.51         | 3.400 (11)   | 172.7          |
|       | N2—                                | 2.78         | 3.545 (10)   | 143.6          |
|       | H2C $\cdots$ Br <sup>3viii</sup>   |              |              |                |
|       | N2—                                | 3.07         | 3.762(13)    | 135.1          |
|       | H2C $\cdots$ Br <sup>2viii</sup>   |              |              |                |
|       | N2—H2D $\cdots$ Br <sup>5vii</sup> | 2.76         | 3.379 (11)   | 127.1          |
|       | N2—H2D $\cdots$ Br <sup>7</sup>    | 2.78         | 3.199 (10)   | 109.6          |
|       | N2—H2D $\cdots$ Br <sup>4vii</sup> | 3.13         | 3.634 (11)   | 117.5          |
|       | N2—H2E $\cdots$ Br <sup>1vi</sup>  | 2.70         | 3.571 (12)   | 163.7          |
|       | N2—H2E $\cdots$ Br <sup>3vi</sup>  | 3.05         | 3.455 (11)   | 109.5          |
|       | N3—H3C $\cdots$ Br <sup>3iii</sup> | 2.50         | 3.375 (10)   | 164.4          |
|       | N3—H3D $\cdots$ Br <sup>2ii</sup>  | 2.54         | 3.384 (10)   | 156.1          |
|       | N3—H3D $\cdots$ Br <sup>3ii</sup>  | 3.06         | 3.492 (10)   | 111.4          |
|       | N3—H3E $\cdots$ Br <sup>8</sup>    | 2.78         | 3.221 (11)   | 111.3          |
|       | N3—H3E $\cdots$ Br <sup>1ii</sup>  | 2.88         | 3.519 (11)   | 129.2          |
|       | N3—H3C $\cdots$ Br <sup>4i</sup>   | 2.91         | 3.524 (11)   | 126.4          |
| 373 K | N1—                                | 2.64         | 3.512        | 164.6          |
|       | H1A $\cdots$ Br <sup>4xiv</sup>    |              |              |                |
|       | N1—H1B $\cdots$ Br <sup>2xiv</sup> | 2.77         | 3.393        | 127.9          |
|       | N1—H1C $\cdots$ Br <sup>1</sup>    | 2.50         | 3.341        | 156.7          |
|       | N2—H2A $\cdots$ Br <sup>3ix</sup>  | 2.81         | 3.581 (12)   | 144.3          |
|       | N2—H2A $\cdots$ Br <sup>2ix</sup>  | 3.11         | 3.806 (15)   | 135.2          |
|       | N2—                                | 2.71         | 3.580 (13)   | 163.1          |
|       | H2B $\cdots$ Br <sup>1xiii</sup>   |              |              |                |
|       | N2—H2C $\cdots$ Br <sup>4</sup>    | 3.11         | 3.647 (13)   | 119.9          |
|       | N2—H2C $\cdots$ Br <sup>5</sup>    | 2.82         | 3.432 (12)   | 126.5          |
|       | N3—H3A $\cdots$ Br <sup>3x</sup>   | 2.52         | 3.383 (12)   | 161.9          |
|       | N3—H3B $\cdots$ Br <sup>4xi</sup>  | 2.90         | 3.557 (12)   | 131.2          |
|       | N3—H3B $\cdots$ Br <sup>1xii</sup> | 2.94         | 3.570 (12)   | 128.0          |
|       | N3—H3C $\cdots$ Br <sup>2xii</sup> | 2.57         | 3.426 (11)   | 159.8          |

<sup>b</sup> Symmetry codes: (i)  $-x+1, -y+1, -z+1$ ; (ii)  $-x+1, -y+2, -z+1$ ; (iii)  $x-1/2, -y+3/2, z-1/2$ ; (iv)  $x+1, -y+2, z+1/2$ ; (v)  $-x+2, y, -z+3/2$ ; (vi)  $x, -y+2, z-1/2$ ; (vii)  $x, -y+1, z-1/2$ ; (viii)  $-x+3/2, -y+3/2, -z+1$ ; (ix)  $-x+1/2, y-1/2, -z+3/2$ ;

(x)  $x+1/2, y-1/2, z$ ; (xi)  $-x+1, y, -z+3/2$ ; (xii)  $-x+1, y-1, -z+3/2$ ; (xiii)  $x, y-1, z$ ; (xiv)  $-x, y, -z+3/$
